# Supplementary material for: Cr(VI) reduction, electricity production, and microbial resistance variation in paddy soil under microbial fuel cell operation
Source: Copernicus journal article supplement (doi:10.5194/egusphere-2024-2771), 2024-09-30
Supplement: Supplementary file 2 [file egusphere-2024-2771-supplement.pdf]

## Supplementary materials for

Cr(VI) reduction, electricity production, and microbial resistance variation in paddy soil under microbial fuel cell operation

### Sections

**Section 1:** Preparation of cathode supported by Fe<sub>3</sub>O<sub>4</sub> catalyst

**Section 2:** Python code of Raspberry Pi voltage acquisition system

### Table Captions

**Table S1.** Main material dimensions

**Table S2.** Primer sequence of HRGs and MGEs

**Table S3.** Distribution percentage of EDS elements in electrode materials

**Table S4.** SMFC power generation performance on 15-day and 30-day

**Table S5.** Performance comparison of various configurations of SMFC.

### Figure captions

**Fig. S1** SMFC structure and experimental grouping.

**Fig. S2** Electrode material characterization. (A, B) SEM images of GF without catalyst loading; (C, D) SEM images of aluminum foam.

**Fig. S3** Variation of (A) total chromium and (B) Cr(VI) in overlying water during SMFC operation.

**Fig. S4** pH (A), EC (B) variation curves of soil.

**Fig. S5** Changes in soil enzyme activities during SMFC operation (A) Dehydrogenase (B) Urease (C) Invertase (D) Acid Phosphatase.

**Fig. S6** Venn diagram on OTU level in different treatments.

**Fig. S7** Characterization of electrode materials before and after operation by EDS mapping. (A) EDS image of cathode loaded with  $\text{Fe}_3\text{O}_4$ ; (B) EDS image of cathode after the SMFC operation; (C) EDS image of anode microorganisms; (D) EDS image of the anode after SMFC operation.

### **Section 1:** Preparation of cathode supported by $\text{Fe}_3\text{O}_4$ catalyst

Cathode preparation: 100×50×3 mm graphite felt (GF) (purchased from Jiangsu Xinye Electronic Materials Factory, Jjiangsu, China) was selected as the cathode material of the SMFC, which was ultrasonicated in ethanol for 50 min to remove impurities, removed, and washed. Then put it into an oven and dried at 60°C for 12 h. It was put into the hydrothermal synthesis reactor and added concentrated nitric acid, and reacted at 90°C for 9 h. After the reaction was completed, the GF was rinsed continuously with ultrapure water to ensure that the pH of the rinsed water was neutral, and dried at 60°C for 12 h to complete the pre-activation of the GF. The  $\text{Fe}_3\text{O}_4$  catalyst was obtained by dissolving 3.6 g of ferric chloride hexahydrate, 6 g of sodium acetate, and 1 g of sodium citrate in 140 ml of ethylene glycol, and repeatedly ultrasonicated for 2 h to form a homogeneous solution. The pre-activated GF was put into a hydrothermal synthesis reactor: the  $\text{Fe}_3\text{O}_4$  catalyst was added and soaked for half an

hour and then heated at 200°C for 8 h. After heating, the reactor was cooled down to room temperature, washed repeatedly with ultrapure water and ethanol, and then put into an oven at 60°C to dry for 12 h. The reaction was then dried at 60°C.

## Section 2: Python code of Raspberry Pi voltage acquisition system

```
1.  #-*- coding:UTF-8 -*-
2.  from threading import Timer
3.  import time
4.  import RPi.GPIO as GPIO
5.  import datetime
6.  import os
7.  import sys
8.  import xlwt
9.
10. sys.path.append('./modules/')
11.
12. from GetVoltage import get_voltage
13. from modules.ADS1263 import ADS1263
14.
15. GPIO.setmode(GPIO.BCM)
16. CollectTimes = 150
17.
18. def _get_average_list():
19.     """smooth"""
20.     if CollectTimes <= 0:
21.         print("Error number for the array to averaging!/n")
22.         return -1
23.     elif CollectTimes <= 5:
24.         return sum(VoltageArray) / CollectTimes
25.     else:
26.         return sum(VoltageArray) / CollectTimes
27.
28. # clean txt
29. book = xlwt.Workbook(encoding='utf-8',style_compression=0)
30. sheet = book.add_sheet('MFCdata',cell_overwrite_ok=True)
31. col = ('current time','MFC1','MFC2','MFC3')
32. for i in range(0,4):
33.     sheet.write(0,i,col[i])
34.
35. x=0
36. while(1):
37.     x=x+1
38.
39.     time.sleep(1)
40.
```

```
41. VoltageArray = []
42. for i in range(CollectTimes):
43.     VoltageArray.append(get_voltage(0))
44.     adc1 = _get_average_list()
45.
46. #####
47.
48. VoltageArray = []
49. for i in range(CollectTimes):
50.     VoltageArray.append(get_voltage(1))
51.     adc2 = _get_average_list()
52.
53. #####
54.
55. VoltageArray = []
56. for i in range(CollectTimes):
57.     VoltageArray.append(get_voltage(2))
58.     adc3 = _get_average_list()
59.
60. #####
61.
62. curr_time = datetime.datetime.now()
63. time_str = datetime.datetime.strftime(curr_time,'%Y-%m-%d %H:%M:%S')
64.
65. datalist = [time_str,str(adc1),str(adc2),str(adc3 )]
66. print(datalist)
67.
68. for j in range(0, 4):
69.     sheet.write(x, j, datalist[j])
70.     savepath = '/home/pi/excel.xls'
71.     book.save(savepath)
72.
73. time.sleep(598.5)
```

**Table S1** Main material dimensions

| Material        | Length/cm | Width/cm | Area/cm <sup>2</sup> |
|-----------------|-----------|----------|----------------------|
| Collector plate | 10.5      | 5.5      | 57.75                |
| Aluminum foam   | 6.6       | 5.4      | 35.64                |
| GF              | 10.0      | 5.0      | 50.00                |

**Table S2** Primer sequence of HRGs and MGEs

| Gene            | Primer sequence                     | Function description                                                                                                                                      | Ref                                 |
|-----------------|-------------------------------------|-----------------------------------------------------------------------------------------------------------------------------------------------------------|-------------------------------------|
| <i>chrA-F</i>   | TCC TTC GGC GGC CCT GCCggncarathgc  | <i>chrA</i> encodes a transporter protein involved in chromate efflux.                                                                                    | (Rivera et al., 2008)               |
| <i>chrA-R</i>   | GTA GGT GGC CAG CTG Ctnngcytcngncc  |                                                                                                                                                           |                                     |
| <i>chrB-F</i>   | CCGGAATTCATGCGTGTCTGGCGAACCCCTGA    | <i>chrB</i> genes regulate the transcription of genes in the transporter protein complex.                                                                 | (Branco and Morais, 2013)           |
| <i>chrB-R</i>   | CCC AAG CTT TCA CTC TGC GGA AGA ACG |                                                                                                                                                           |                                     |
|                 | A                                   |                                                                                                                                                           |                                     |
| <i>ChrR-F</i>   | AGG AAC TTC TGC GTG CCC TC          | The chromate reductase                                                                                                                                    | (Baldiris et al., 2018;             |
| <i>ChrR-R</i>   | TAC GGT GAC AGT GCG TTT GC          | <i>chrR</i> is the best-known of the reductases that catalyze the reduction of Cr <sup>6+</sup> to Cr <sup>3+</sup> .                                     | Nepple et al., 2000).               |
| <i>IntI-F</i>   | CGA ACG AGT GGC GGA GGG TG          | MGEs such as integrons, plasmids, and transposons play a key role in the transfer of resistance genes between different microorganisms in the environment | (Wu et al., 2023; Wu et al., 2022); |
| <i>IntI-R</i>   | TAC CCG AGA GCT TGG CAC CCA         |                                                                                                                                                           |                                     |
| <i>tnpA02-F</i> | GGG CGG GTC GAT TGA AA              |                                                                                                                                                           |                                     |
| <i>tnpA02-R</i> | GTG GGC GGG ATC TGC TT              |                                                                                                                                                           |                                     |
| <i>tnpA05-F</i> | GCC GCA CTG TCG ATT TTT ATC         |                                                                                                                                                           |                                     |
| <i>tnpA05-R</i> | GCG GGA TCT GCC ACT TCT T           |                                                                                                                                                           |                                     |
|                 |                                     |                                                                                                                                                           |                                     |

**Table S3** Distribution percentage of EDS elements in electrode materials.

| Elements | Samples |                                             |                            |        |                           |                          |
|----------|---------|---------------------------------------------|----------------------------|--------|---------------------------|--------------------------|
|          | Cathode | Fe <sub>3</sub> O <sub>4</sub> -<br>cathode | Cathode after<br>operation | Anode  | Anode with<br>EAB-loading | Anode after<br>operation |
| C        | 93.74%  | 66.85%                                      | 33.83%                     | 6.7%   | 14.65%                    | 14.35%                   |
| O        | 6.26%   | 19.97%                                      | 38.96%                     | 47.57% | 18.49%                    | 50.92%                   |
| Fe       | n.d.    | 13.17%                                      | 8.07%                      | n.d.   | n.d.                      | 0.88                     |
| Mg       | n.d.    | n.d.                                        | 0.44%                      | n.d.   | 0.41%                     | n.d.                     |
| Al       | n.d.    | n.d.                                        | 3.34%                      | 37.04% | 53.72%                    | 17.56%                   |
| Cr       | n.d.    | n.d.                                        | 0.08%                      | n.d.   | n.d.                      | 0.12%                    |
| Cu       | n.d.    | n.d.                                        | n.d.                       | n.d.   | 1.59%                     | n.d.                     |
| Zn       | n.d.    | n.d.                                        | n.d.                       | n.d.   | 1.81%                     | n.d.                     |
| Si       | n.d.    | n.d.                                        | 7.16%                      | 8.68%  | 9.32%                     | 2.58%                    |
| Na       | n.d.    | n.d.                                        | 2.18%                      | n.d.   | n.d.                      | 4.55%                    |
| Ca       | n.d.    | n.d.                                        | 4.81%                      | n.d.   | n.d.                      | n.d.                     |
| K        | n.d.    | n.d.                                        | 1.12%                      | n.d.   | n.d.                      | 0.58%                    |
| Cl       | n.d.    | n.d.                                        | n.d.                       | n.d.   | n.d.                      | 2.67%                    |
| P        | n.d.    | n.d.                                        | n.d.                       | n.d.   | n.d.                      | 5.81%                    |

**Table S4** SMFC power generation performance on 15-day and 30-day

| Resistor ( $\Omega$ ) | 15d-Current density<br>(mA/m <sup>2</sup> ) | 15d-Power density<br>(mW/m <sup>2</sup> ) | 30d-Current density<br>(mA/m <sup>2</sup> ) | 30d-Power density<br>(mW/m <sup>2</sup> ) |
|-----------------------|---------------------------------------------|-------------------------------------------|---------------------------------------------|-------------------------------------------|
| 51                    | 448.57                                      | 37.43                                     | 485.23                                      | 42.21                                     |
| 100                   | 386.53                                      | 53.84                                     | 424.57                                      | 63.47                                     |
| 200                   | 296.55                                      | 62.24                                     | 357.26                                      | 90.22                                     |
| 510                   | 202.88                                      | 73.52                                     | 238.08                                      | 102.02                                    |
| 1000                  | 131.18                                      | 60.60                                     | 157.54                                      | 87.35                                     |
| 2000                  | 75.99                                       | 40.43                                     | 95.91                                       | 64.58                                     |
| 5100                  | 31.55                                       | 17.77                                     | 43.88                                       | 34.41                                     |

|       |       |       |       |       |
|-------|-------|-------|-------|-------|
| 10000 | 17.01 | 10.13 | 23.95 | 20.09 |
|-------|-------|-------|-------|-------|

**Table S5** Performance comparison of various configurations of SMFC.

| Reactor configuration      | Chamber volume (L) | Output voltage (V) | Maximum power density (mW/m <sup>2</sup> ) | Reference                 |
|----------------------------|--------------------|--------------------|--------------------------------------------|---------------------------|
| Single-chamber SMFC        | 0.72               | 0.33               | 17.3                                       | (Li et al., 2016)         |
| Single-chamber SMFC        | 2.16               | 0.297              | 12.1                                       | (Yu et al., 2017)         |
| Two-chamber SMFC           | 4.2                | 0.399              | 29.78                                      | (Srivastava et al., 2019) |
| Single-chamber circle SMFC | 0.95               | 0.345              | 24                                         | (Yu et al., 2021)         |
| Single-chamber SMFC        | 8                  | 0.4-0.6            | 0.2 mW                                     | (Yoon et al., 2023)       |
| Single-chamber circle SMFC | n.m.               | n.m.               | 25.51                                      | (Wang et al., 2023)       |
| Single-chamber SMFC        | 9.7                | n.m.               | 70.4±1.4                                   | (Dhillon et al., 2023)    |
| Two-chamber SMFC           | 0.05               | n.m.               | 71.00 ± 0.82                               | (Zhang et al., 2023a)     |
| Constructed wetland MFC    | 38.85              | 0.197              | 12.5                                       | (Tao et al., 2023)        |
| Constructed wetland MFC    | 4.08               | 0.425              | 28.1                                       | (Niu et al., 2023)        |
| Plant-SMFC                 | 0.769              | 0.51               | 46.8                                       | (V et al., 2023)          |
| Single-chamber circle SMFC | 2                  | 0.17               | 10                                         | (Youssef et al., 2023)    |
| Constructed wetland MFC    | 2.7                | 0.394              | 4468.4                                     | (Zhang et al., 2023b)     |
| Two-chamber SMFC           | 0.5                | 0.306              | 20.35                                      | (Zhang et al., 2024)      |
| Constructed wetland MFC    | 13                 | 0.167              | 1.4                                        | (Dai et al., 2024)        |
| Plant-SMFC                 | 1.05               | 0.55               | 8957.7                                     | (Chen et al., 2024)       |
| Single-chamber circle SMFC | 1.6                | 0.4                | 472.52±14.2                                | (Zhao et al., 2024)       |
| Single-chamber             | 1.4                | 0.528              | 178.17                                     | (Sun and Wang,            |



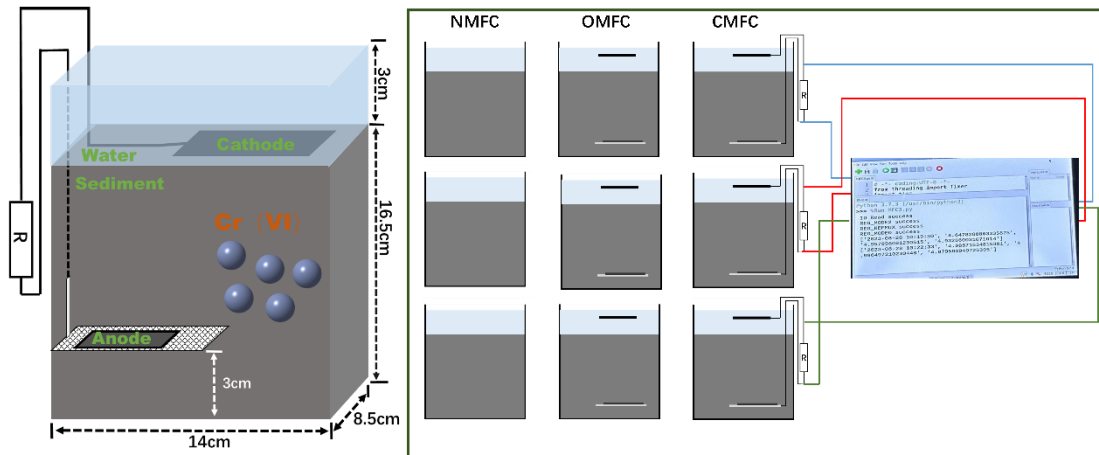

Fig. S1 SMFC structure and experimental grouping.

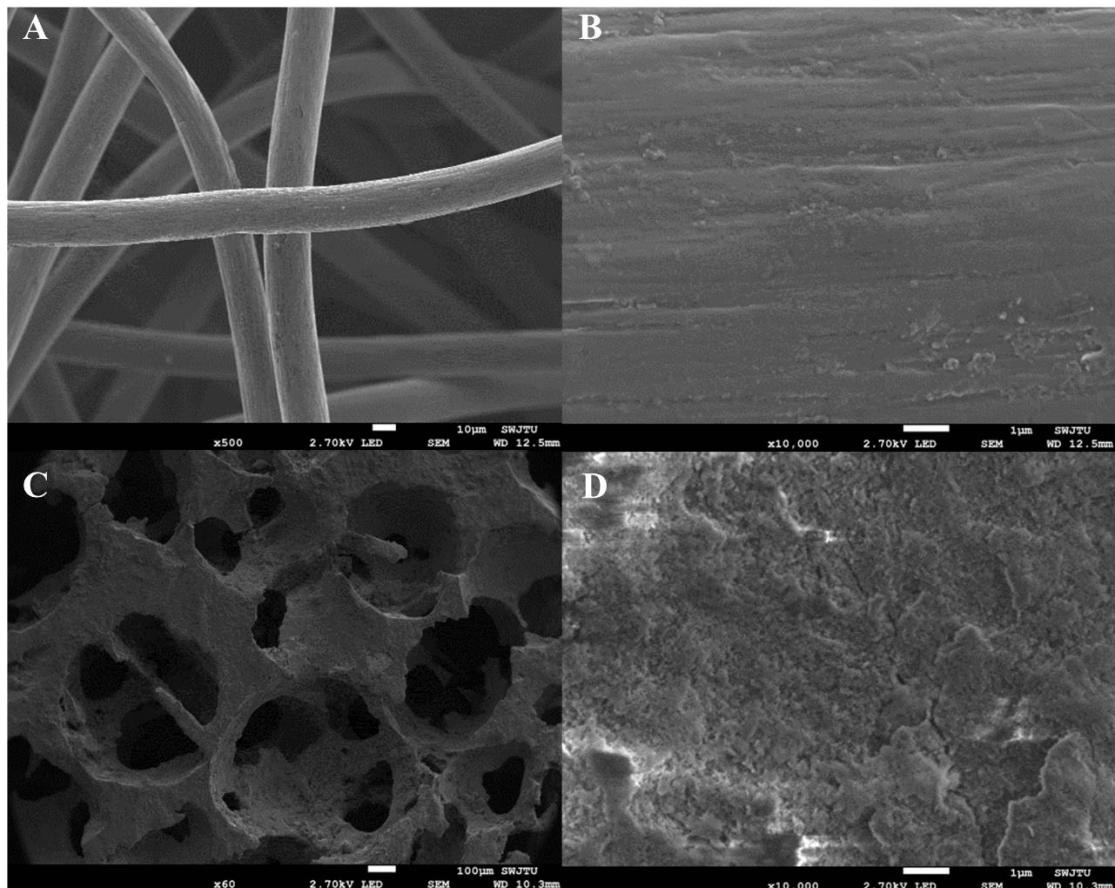

Fig. S2 Electrode material characterization. (A, B) SEM images of GF without

catalyst loading; (C, D) SEM images of aluminum foam.

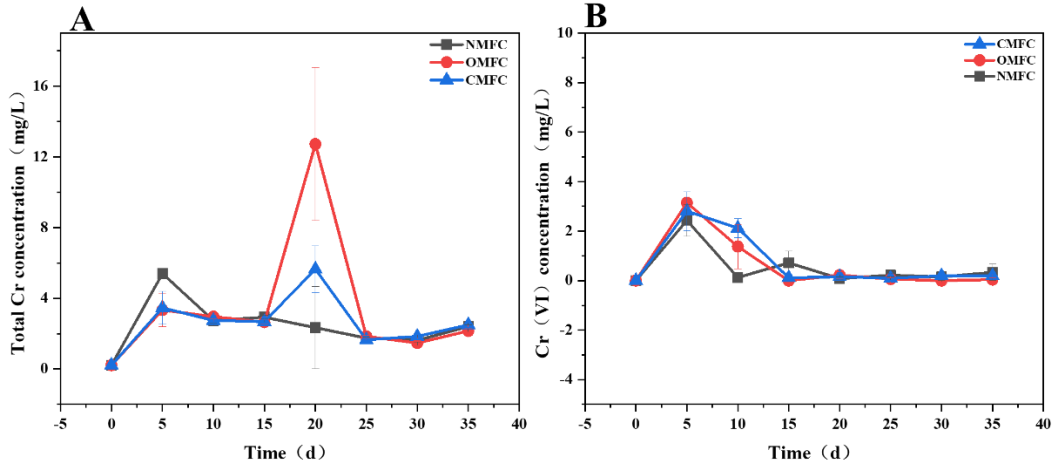

**Fig. S3** Variation of (A) total chromium and (B) Cr(VI) in overlying water during SMFC operation.

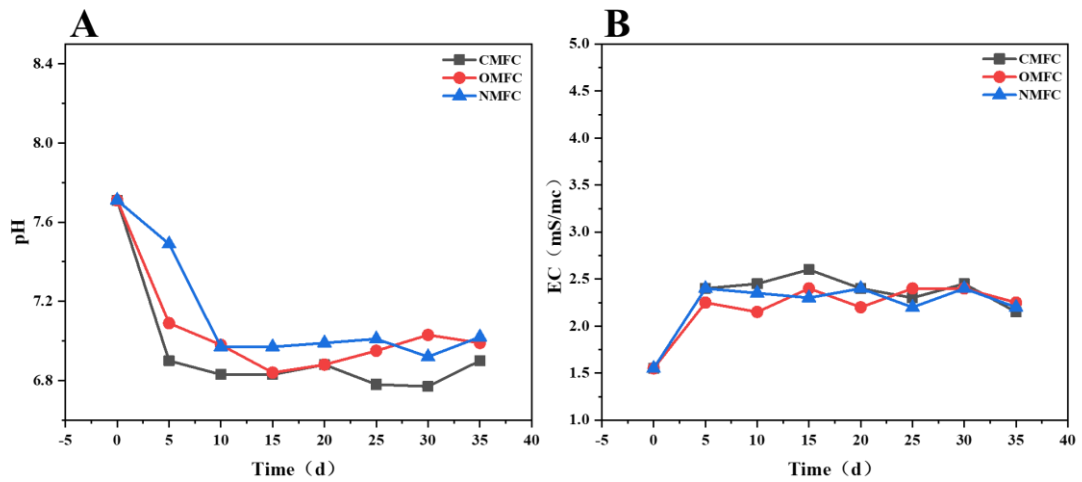

**Fig. S4** pH (A), EC (B) variation curves of soil.

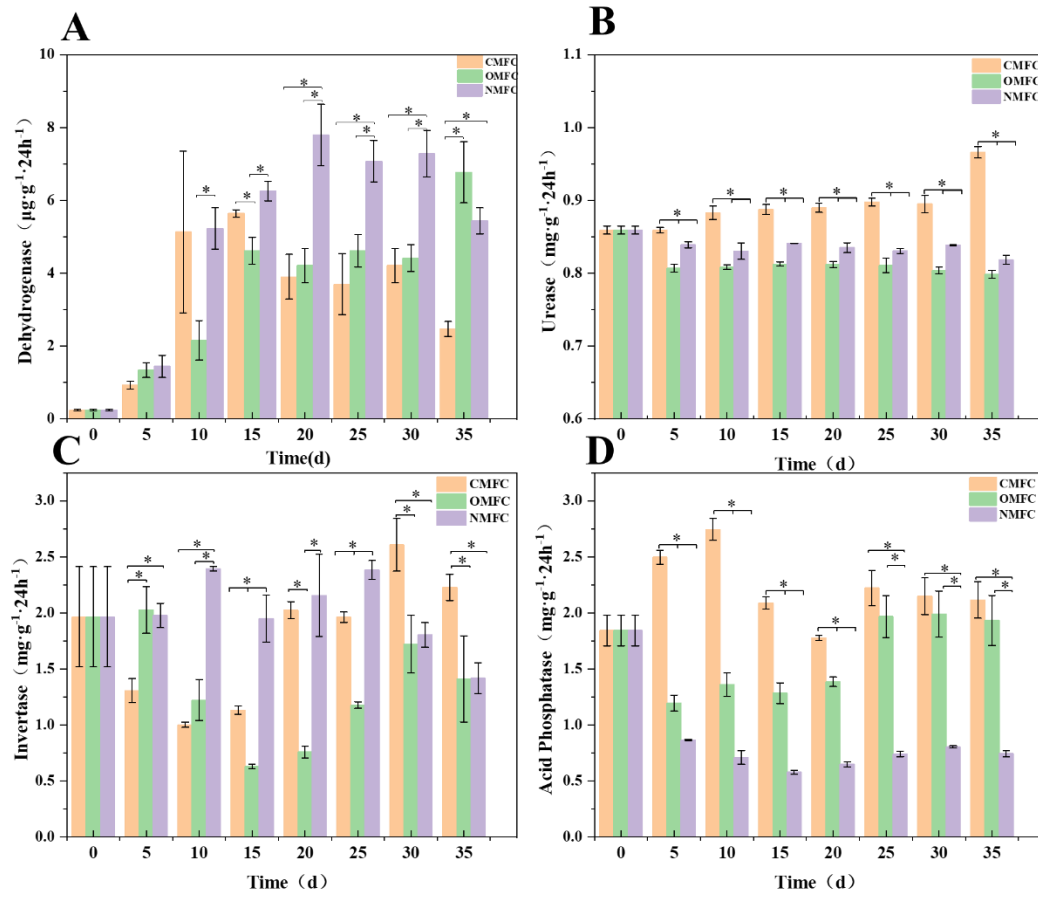

**Fig. S5** Changes in soil enzyme activities during SMFC operation (A) Dehydrogenase (B) Urease (C) Invertase (D) Acid Phosphatase.

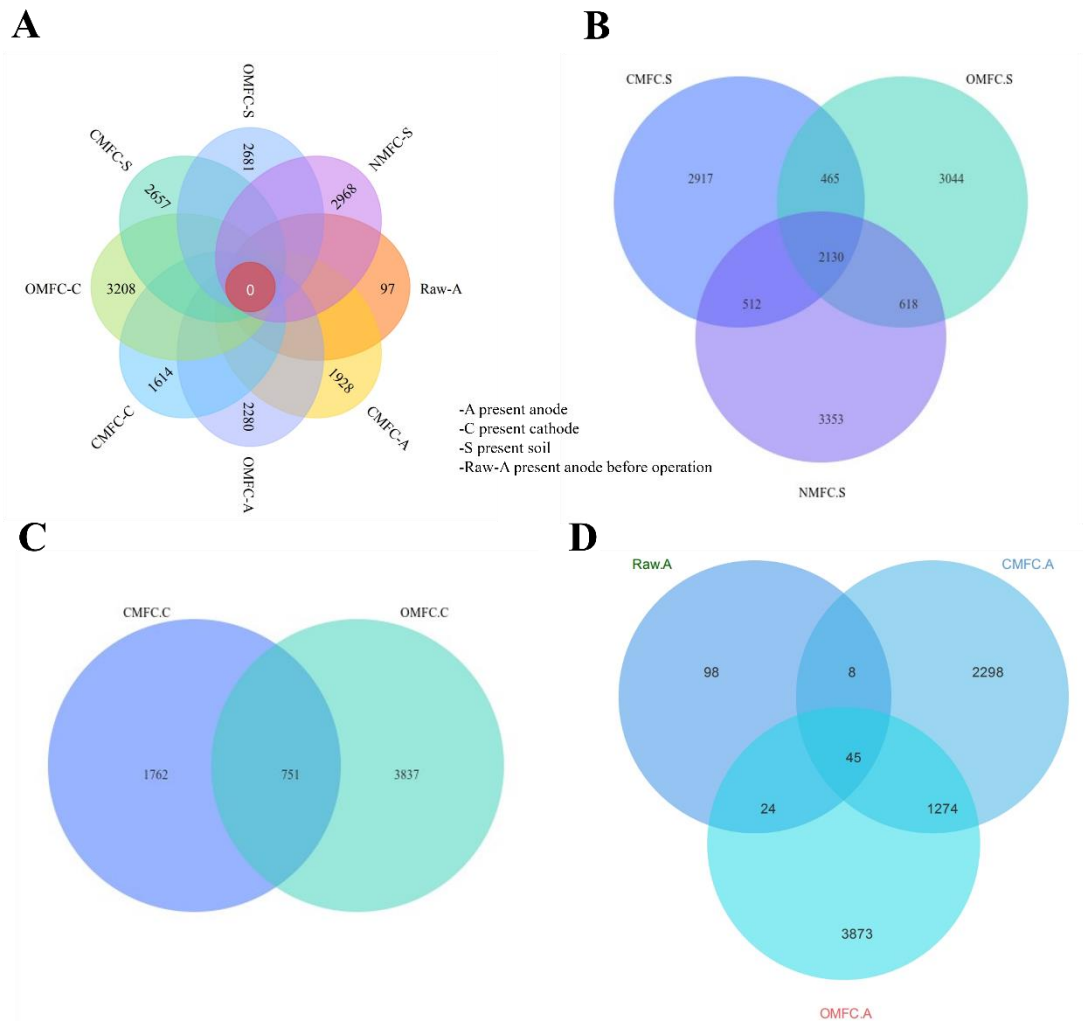

**Fig. S6** Venn diagram on OTU level in different treatments

**A**

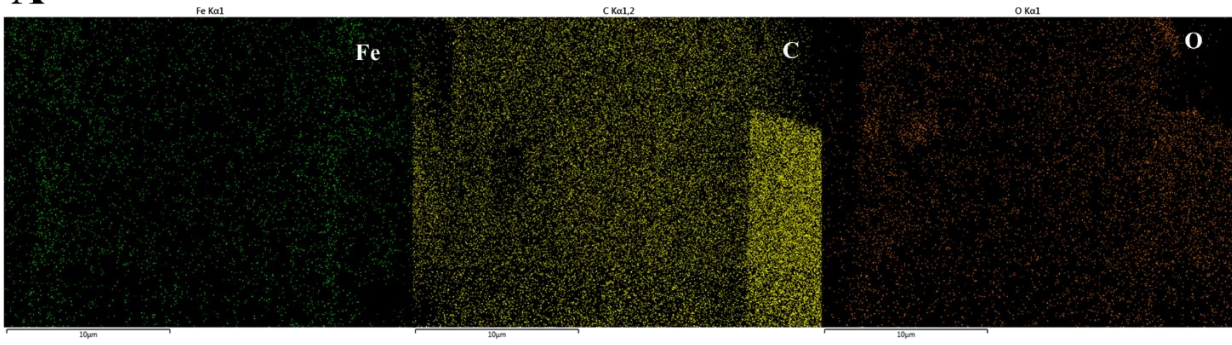

**B**

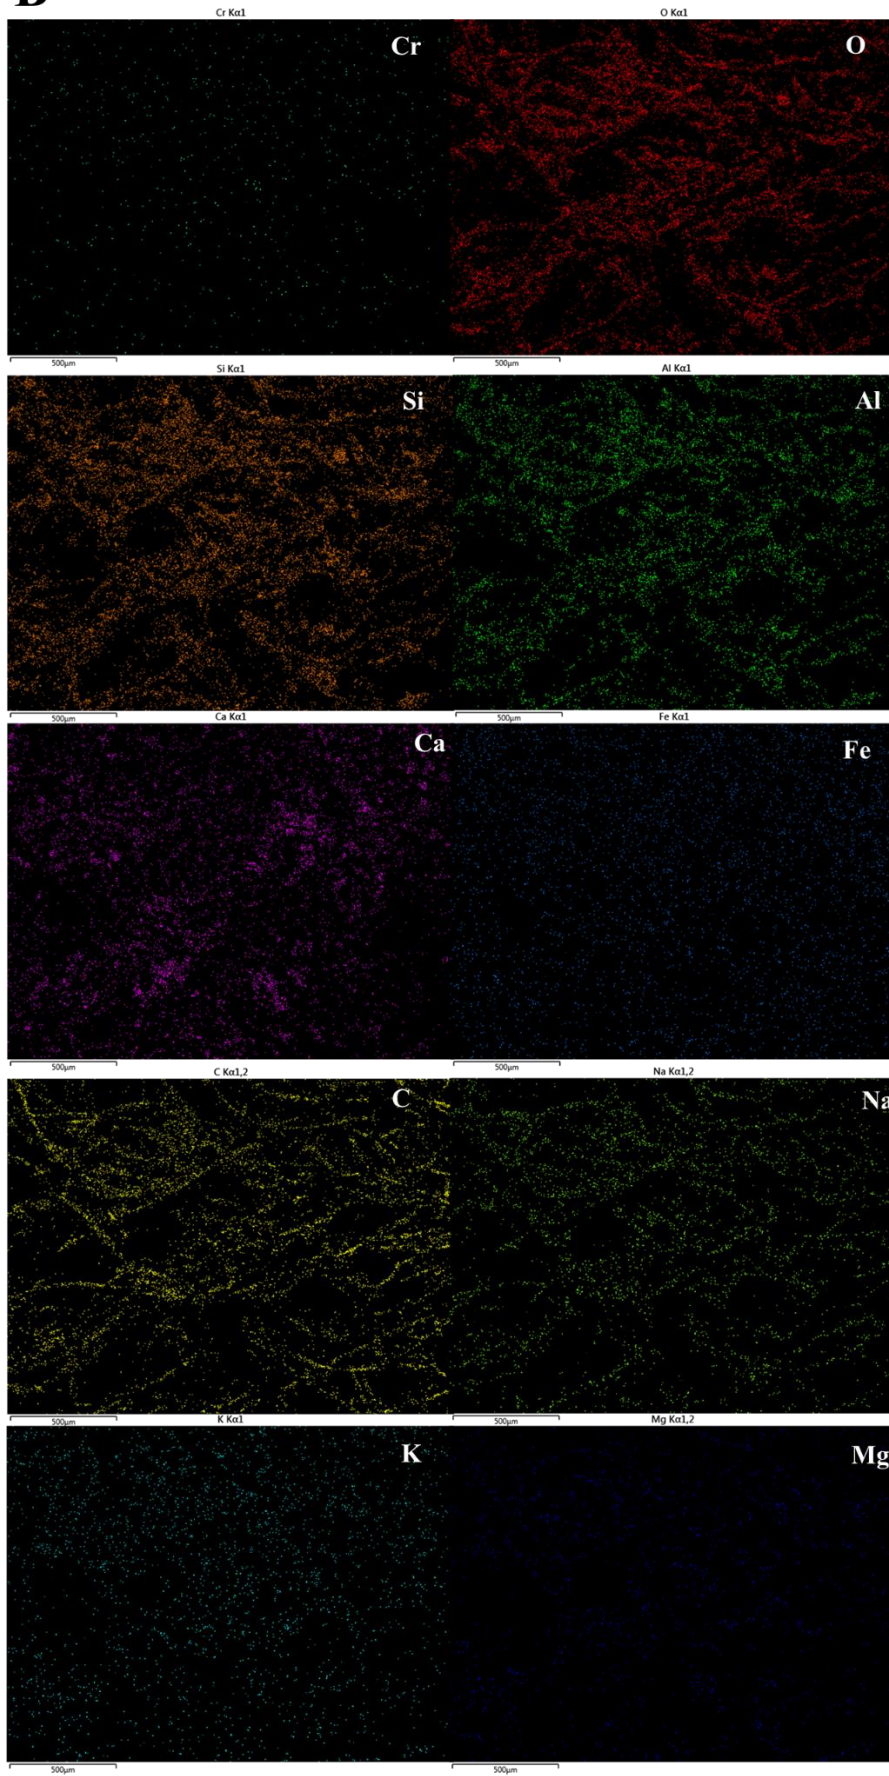

C

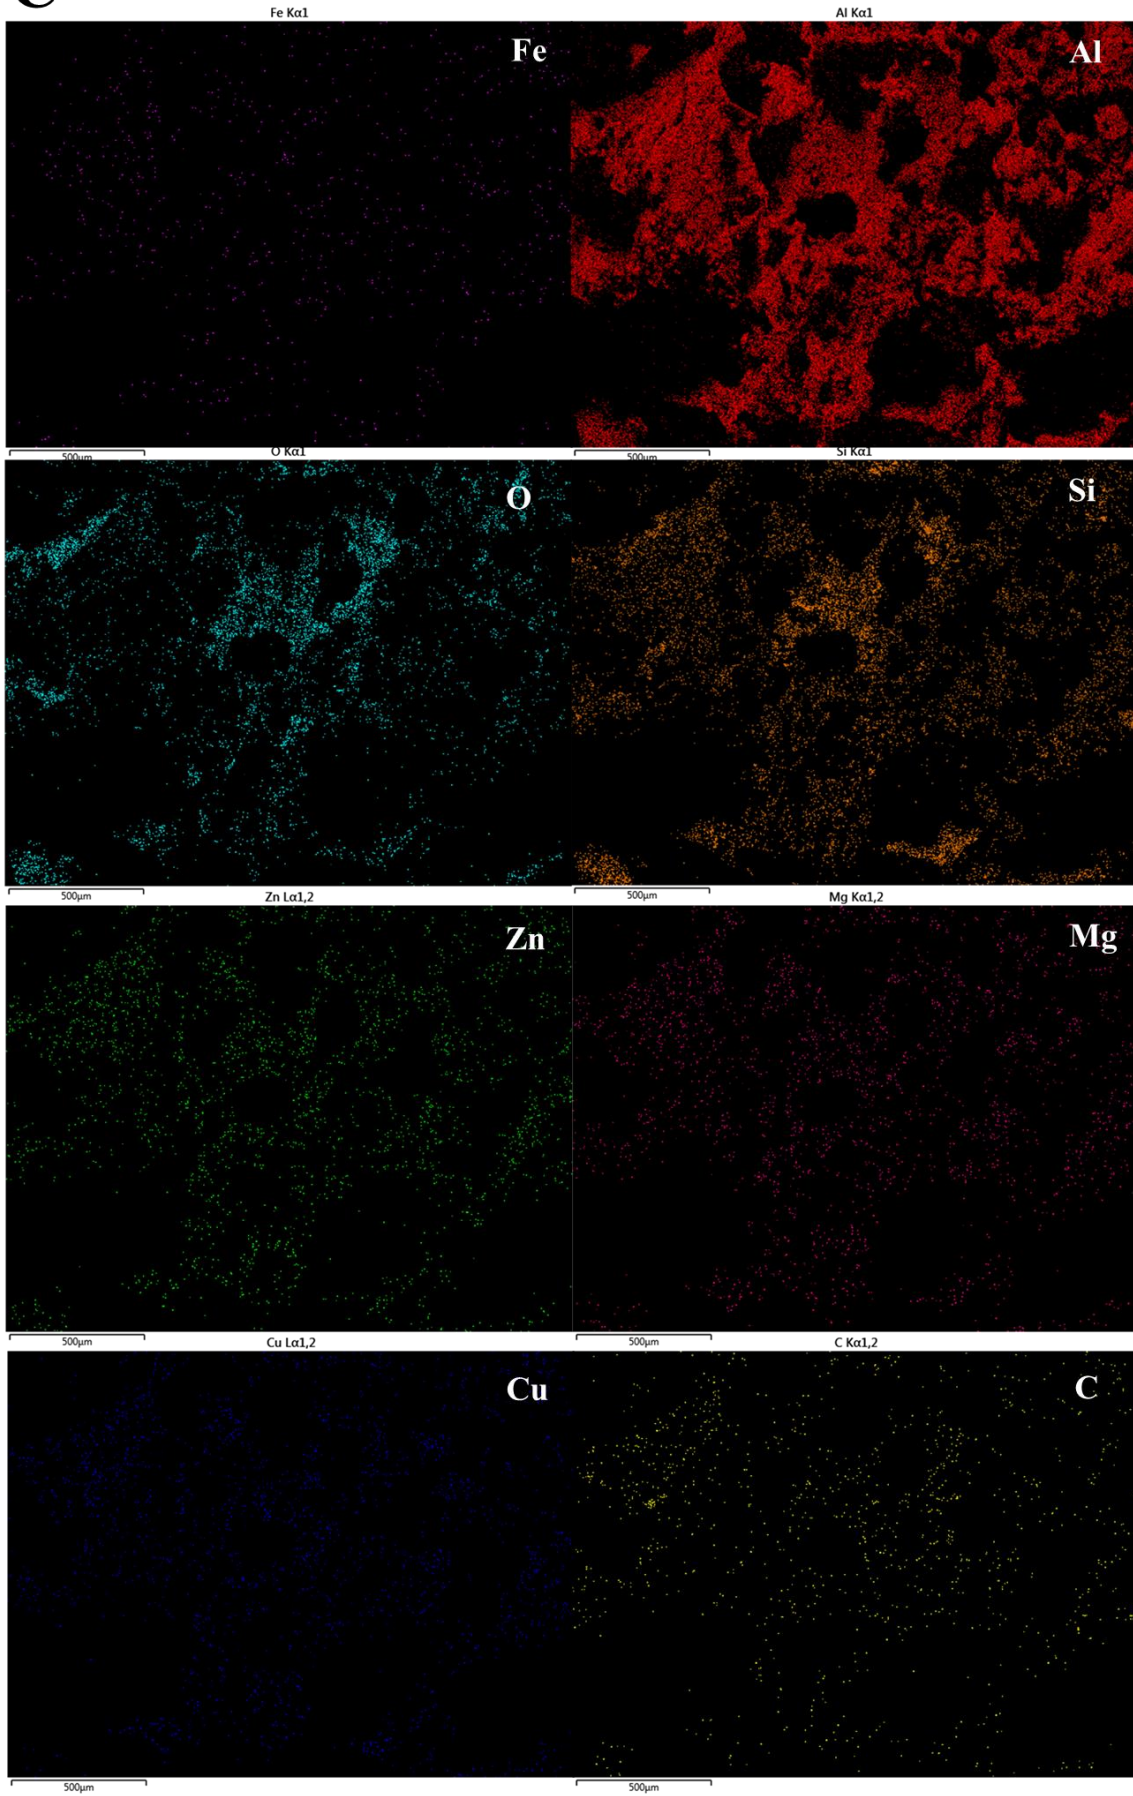

**D**

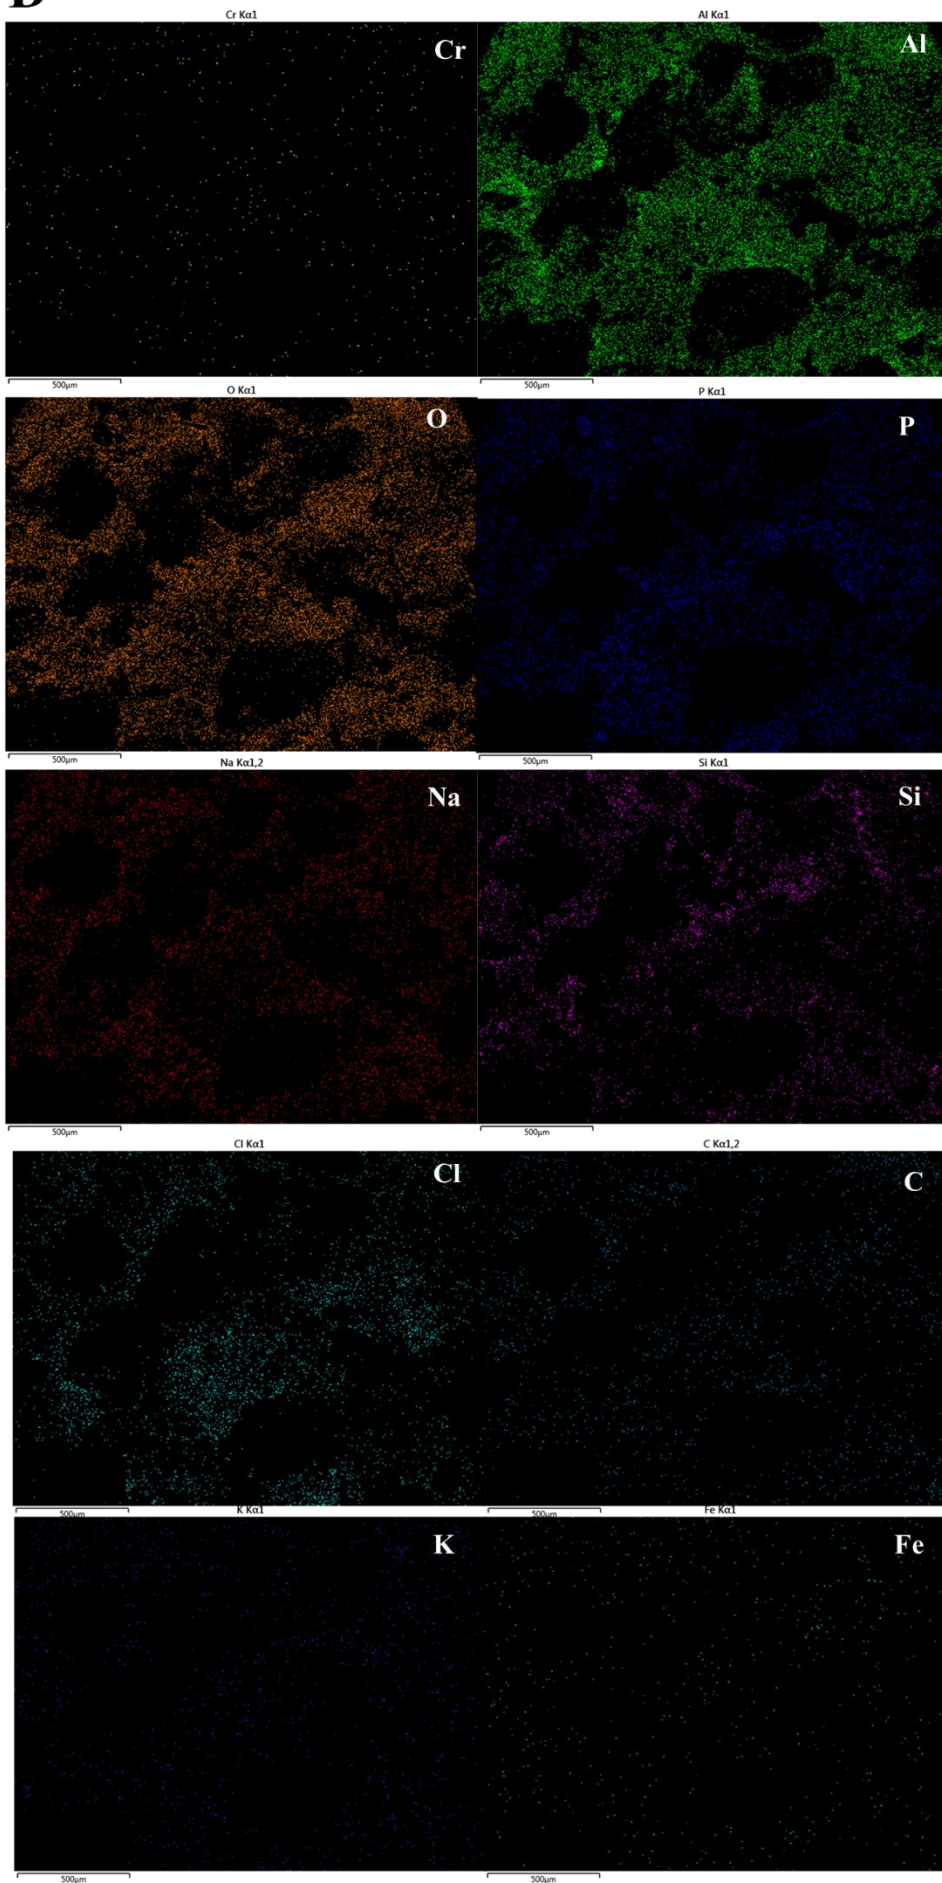



**Fig. S7** Characterization of electrode materials before and after operation by EDS mapping. (A) EDS image of cathode loaded with  $\text{Fe}_3\text{O}_4$ ; (B) EDS image of cathode after the SMFC operation; (C) EDS image of anode microorganisms; (D) EDS image of the anode after SMFC operation.

## Reference:

- Baldiris, R., Acosta-Tapia, N., Montes, A., Hernández, J., Vivas-Reyes, R., (2018). Reduction of Hexavalent Chromium and Detection of *Chromate Reductase* (*ChrR*) in *Stenotrophomonas maltophilia*. *Molecules* 23(2), 406. <https://doi.org/10.3390/molecules23020406>.
- Branco, R., Morais, P.V., (2013). Identification and Characterization of the Transcriptional Regulator ChrB in the Chromate Resistance Determinant of *Ochrobactrum tritici* 5bv11. *PLoS One* 8(11), e77987. <https://doi.org/10.1371/journal.pone.0077987>.
- Chen, B., Li, L., Cai, W., Garg, A., (2024). Bioelectricity generation in plant microbial fuel cells: Influence of vegetation density and unsaturated soil properties. *Biomass and Bioenergy* 181, 107053. <https://doi.org/10.1016/j.biombioe.2024.107053>.
- Dai, M., Li, F., Zhang, J., Shi, Q., Wu, Y., Kong, Q., (2024). Treatment of formaldehyde-containing wastewater and power generation by constructed wetland–microbial fuel cells enhanced by formaldehyde-degrading bacteria. *Journal of Water Process Engineering* 59, 104984. <https://doi.org/10.1016/j.jwpe.2024.104984>.
- Dhillon, S.K., Dziegielowski, J., Kundu, P.P., Di Lorenzo, M., (2023). Functionalised graphite felt anodes for enhanced power generation in membrane-less soil microbial fuel cells. *RSC Sustainability* 1(2), 310-325. <https://doi.org/10.1039/D2SU00079B>.
- Li, X., Wang, X., Zhao, Q., Wan, L., Li, Y., Zhou, Q., (2016). Carbon fiber enhanced bioelectricity generation in soil microbial fuel cells. *Biosensors and Bioelectronics* 85, 135-141. <https://doi.org/10.1016/j.bios.2016.05.001>.
- Nepple, B.B., Kessi, J., Bachofen, R., (2000). Chromate reduction by *Rhodobacter sphaeroides*. *Journal of Industrial Microbiology and Biotechnology* 25(4), 198-203. <https://doi.org/10.1038/sj.jim.7000049>.
- Niu, Y., Qu, M., Du, J., Wang, X., Yuan, S., Zhang, L., Zhao, J., Jin, B., Wu, H., Wu, S., Cao, X., Pang, L., (2023). Effects of multiple key factors on the performance of petroleum coke-based constructed wetland-microbial fuel cell. *Chemosphere* 315, 137780. <https://doi.org/10.1016/j.chemosphere.2023.137780>.
- Rivera, S.L., Vargas, E., Ramírez-Díaz, M.I., Campos-García, J., Cervantes, C., (2008). Genes related to chromate resistance by *Pseudomonas aeruginosa* PAO1. *Antonie Van Leeuwenhoek* 94(2), 299-305. <https://doi.org/10.1007/s10482-008-9247-x>.
- Srivastava, P., Gupta, S., Garaniya, V., Abbassi, R., Yadav, A.K., (2019). Up to 399 mV bioelectricity generated by a rice paddy-planted microbial fuel cell assisted with a blue-green algal cathode. *Environmental Chemistry Letters* 17(2), 1045-1051. <https://doi.org/10.1007/s10311-018-00824-2>.
- Sun, M., Wang, C., (2024). The application of ferrous and graphitic N modified graphene-based composite cathode material in the bio-electro-Fenton system

- driven by sediment microbial fuel cells to degrade methyl orange. *Heliyon* 10(3), e24772. <https://doi.org/10.1016/j.heliyon.2024.e24772>.
- Tao, M., Kong, Y., Jing, Z., Guan, L., Jia, Q., Shen, Y., Hu, M., Li, Y.-Y., (2023). Acorus calamus recycled as an additional carbon source in a microbial fuel cell-constructed wetland for enhanced nitrogen removal. *Bioresource Technology* 384, 129324. <https://doi.org/10.1016/j.biortech.2023.129324>.
- V, K.K., K, M.m., Manju, P., Gajalakshmi, S., (2023). Harnessing plant microbial fuel cells for resource recovery and methane emission reduction in paddy cultivation. *Energy Conversion and Management* 294, 117545. <https://doi.org/10.1016/j.enconman.2023.117545>.
- Wang, H., Long, X., Cao, X., Li, L., Zhang, J., Zhao, Y., Wang, D., Wang, Z., Meng, H., Dong, W., Jiang, C., Li, J., Li, X., (2023). Stimulation of atrazine degradation by activated carbon and cathodic effect in soil microbial fuel cell. *Chemosphere* 320, 138087. <https://doi.org/10.1016/j.chemosphere.2023.138087>.
- Wu, C., Song, X., Wang, D., Ma, Y., Ren, X., Hu, H., Shan, Y., Ma, X., Cui, J., Ma, Y., (2023). Effects of long-term microplastic pollution on soil heavy metals and metal resistance genes: Distribution patterns and synergistic effects. *Ecotoxicology and Environmental Safety* 262, 115180. <https://doi.org/10.1016/j.ecoenv.2023.115180>.
- Wu, Y., Wen, Q., Chen, Z., Fu, Q., Bao, H., (2022). Response of antibiotic resistance to the co-exposure of sulfamethoxazole and copper during swine manure composting. *Science of The Total Environment* 805, 150086. <https://doi.org/10.1016/j.scitotenv.2021.150086>.
- Yoon, Y., Kim, B., Cho, M., (2023). Mineral transformation of poorly crystalline ferrihydrite to hematite and goethite facilitated by an acclimated microbial consortium in electrodes of soil microbial fuel cells. *Science of The Total Environment* 902, 166414. <https://doi.org/10.1016/j.scitotenv.2023.166414>.
- Youssef, Y.A., Abuarab, M.E., Mahrous, A., Mahmoud, M., (2023). Enhanced degradation of ibuprofen in an integrated constructed wetland-microbial fuel cell: treatment efficiency, electrochemical characterization, and microbial community dynamics. *RSC Advances* 13(43), 29809-29818. <https://doi.org/10.1039/D3RA05729A>.
- Yu, B., Feng, L., He, Y., Yang, L., Xun, Y., (2021). Effects of anode materials on the performance and anode microbial community of soil microbial fuel cell. *Journal of Hazardous Materials* 401, 123394. <https://doi.org/10.1016/j.jhazmat.2020.123394>.
- Yu, B., Tian, J., Feng, L., (2017). Remediation of PAH polluted soils using a soil microbial fuel cell: Influence of electrode interval and role of microbial community. *Journal of Hazardous Materials* 336, 110-118. <https://doi.org/10.1016/j.jhazmat.2017.04.066>.
- Zhang, C., Lu, H., Wang, B., Hu, Z., (2024). Study on the Performance of Two-

- Compartment Microbial Fuel Cells Under Different Heavy Metal Concentrations. *Water, Air, & Soil Pollution* 235(1), 58. <https://doi.org/10.1007/s11270-023-06869-6>.
- Zhang, G., Wang, Z., Liu, M., Huang, L., Jiao, Y., Zhao, Z., (2023a). Self-Driven Electrokinetic Remediation of Cd Contamination Soil by Using Double-Chamber Microbial Fuel Cell. *Journal of The Electrochemical Society* 170(7), 075502. <https://doi.org/10.1149/1945-7111/ace6fd>.
- Zhang, Q., Wang, L., Xu, D., Tao, Z., Li, J., Chen, Y., Cheng, Z., Tang, X., Wang, S., (2023b). Accelerated Pb(II) removal and concurrent bioelectricity production via constructed wetland-microbial fuel cell: Structural orthogonal optimization and microbial response mechanism. *Journal of Water Process Engineering* 56, 104287. <https://doi.org/10.1016/j.jwpe.2023.104287>.
- Zhao, S., Li, H., Zhou, J., Sumpradit, T., Salama, E.-S., Li, X., Qu, J., (2024). Simultaneous degradation of NSAIDs in aqueous and sludge stages by an electron-Fenton system derived from sediment microbial fuel cell based on a novel Fe@Mn biochar GDC. *Chemical Engineering Journal* 482, 148979. <https://doi.org/10.1016/j.cej.2024.148979>.
