# Supplementary material for: Cr(VI) reduction, electricity production, and microbial resistance variation in paddy soil under microbial fuel cell operation
Source: Copernicus journal article supplement (doi:10.5194/egusphere-2024-2771), 2024-09-30
Supplement: Supplementary file [file egusphere-2024-2771-AC1-supplement.pdf]

7. The Cr shown in both Figure 1e and Figure 1k is easy to be confused. It is recommended to mark them in the appropriate position in the diagram.

**Response:** Thank you for your kind suggestion. We will attach clear and eye-catching ICONS to the relevant images in the revised manuscript.

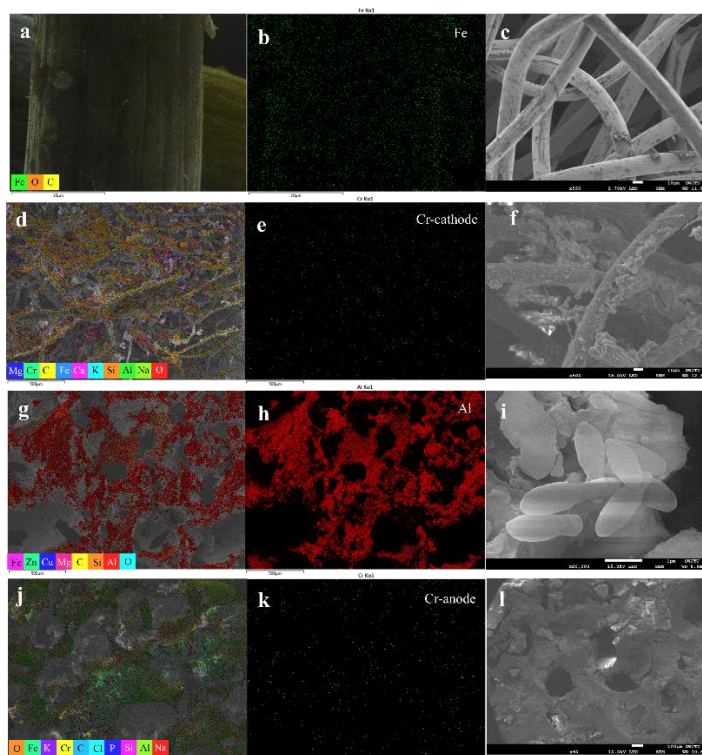

**Fig. 1** Characterization of electrode materials before and after operation by EDS and SEM. (a-c) EDS and SEM images of cathode loaded with  $\text{Fe}_3\text{O}_4$ ; (d-f) EDS and SEM images of cathode after the SMFC operation; (g-h) EDS and SEM images of anode microorganisms; (j-l) EDS and SEM images of the anode after SMFC operation.

8. Figure 2 shows that the cathode is GF while the anode is not represented by the material name. Please uniformly use the electrode or material noun to provide a good reading experience.

**Response:** Thanks for the suggestion. We will use uniform material nouns in the revised manuscript. And Figure is replotted as follows:

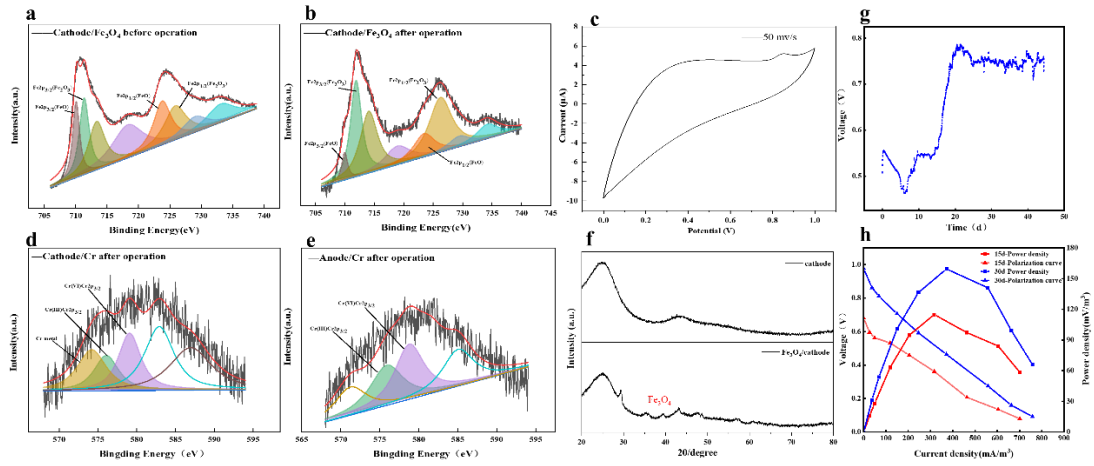

**Fig. 2** Characterization of electrode materials. (a-b) Fe2p spectra of cathode/Fe<sub>3</sub>O<sub>4</sub> composite cathode, (c) cyclic voltammetry (CV) curve of cathode/Fe<sub>3</sub>O<sub>4</sub>, (d-e) Cr2p spectra of GF composite cathode and Anodic Aluminum foam after operation, (f) XRD spectrum of the cathode-Fe<sub>3</sub>O<sub>4</sub>, Power generation performance of SMFC during long-term operation. (g) output voltage distribution, (h) polarization curves and power density curves (15-day vs. 30-day).
